# Supplementary material
Source: publisher figshare collection journal article supplement (https://acs.figshare.com/ndownloader/files/15449627)
Supplement: Supplementary file 1 [file 15449627]

## **Supporting Information**

### **Production of a Double Layer Scaffold for the “On Demand” Release of Fibroblast-Like Limbal Stem Cells**

Calogero Fiorica<sup>a\*‡</sup>, Laura Tomasello<sup>b‡</sup>, Fabio S. Palumbo<sup>a</sup>, Antonina Coppola<sup>b</sup>, Giovanna Pitarresi<sup>a</sup>, Giuseppe Pizzolanti<sup>b</sup>, Carla Giordano<sup>b</sup>, Gaetano Giammona<sup>a</sup>.

<sup>a</sup> Laboratory of Biocompatible Polymers, Department of “Scienze e Tecnologie Biologiche, Chimiche e Farmaceutiche” (STEBICEF), University of Palermo, Via Archirafi, 32, 90123 Palermo, Italy.

<sup>b</sup> University of Palermo, Department of “Promozione della Salute Materno Infantile. Di Medicina Interna e Specialistica di Eccellenza” G. D’Alessandro” (ProMise)

### Supplemental methods

Immune- and Limbal phenotyping by cytofluorimetric analysis: the cells were treated with FcR blocking reagent (Miltenyi Biotec) and incubated with primary antibody or appropriate isotype control at 4 °C for 30 minutes in the dark. Cells were then fixed for 15 minutes at 4 °C with 2% paraformaldehyde (PFA) and washed with staining buffer (PBS, calcium and magnesium free, supplemented with 1% BSA (Sigma-Aldrich)). The f-LSC immunophenotype was determined using the following monoclonal antibodies: HLA-DR FITC, CD80 (B7-1) PE, CD86 (B70/B7-2), CD34 FITC, CD45 FITC (BD Biosciences). The f-LSC immunophenotype was determined using human  $\Delta$ Np63 $\alpha$  antibody (unconjugated p63alpha (H-129) and human ABCG2 antibody (CD338-FITC, Miltenyi Biotec GmbH) according to manufacturer instructions. All data were acquired on a FACSCalibur and analyzed using CELLQuest Pro software (BD Pharmingen). Alexa fluor-488 as corresponding secondary antibody (Invitrogen, Thermo Fisher Scientific) was used. Appropriate isotype control and Alexa fluor antibodies were used as negative controls or secondary antibodies, respectively.

**Table S1- Primer sequences used in qRT-PCR**

| GENE                | PRIMER SEQUENCE                                               | CODE NUMBER       |
|---------------------|---------------------------------------------------------------|-------------------|
| CD105               |                                                               | QT00033569        |
| NANOG               |                                                               | QT01844808        |
| OCT4                |                                                               | QT00210840        |
| SOX2                | F- GGAGACGGAGCTGAAGCCGC<br>R-GACGCGGTCCGGGCTGTTTT             | MWG               |
| Thy-1               |                                                               | QT00023569        |
| CD29                |                                                               | QT00068124        |
| $\Delta Np63\alpha$ | F:5'-GAGGTTGGGCTGTTTCATCAT-3'<br>R:5'-GTGGGAAAGAGATGGTCTGG-3' | Eurofins genomics |
| SOX17               |                                                               | QT90204099        |
| CK15                | F-GGAGGTGGAAGCCGAAGTAT<br>R-GAGAGGAGACCACCATCGCC              |                   |
| CK12                |                                                               | QT00011949        |
| CK3                 |                                                               | QT00050365        |

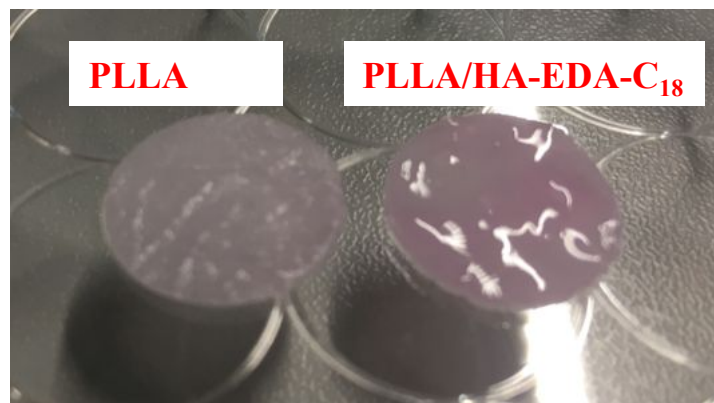

**Figure S1 - PLLA electrospun scaffold uncovered (on the right) and covered with HA-EDA-C<sub>18</sub> film (on the left)**

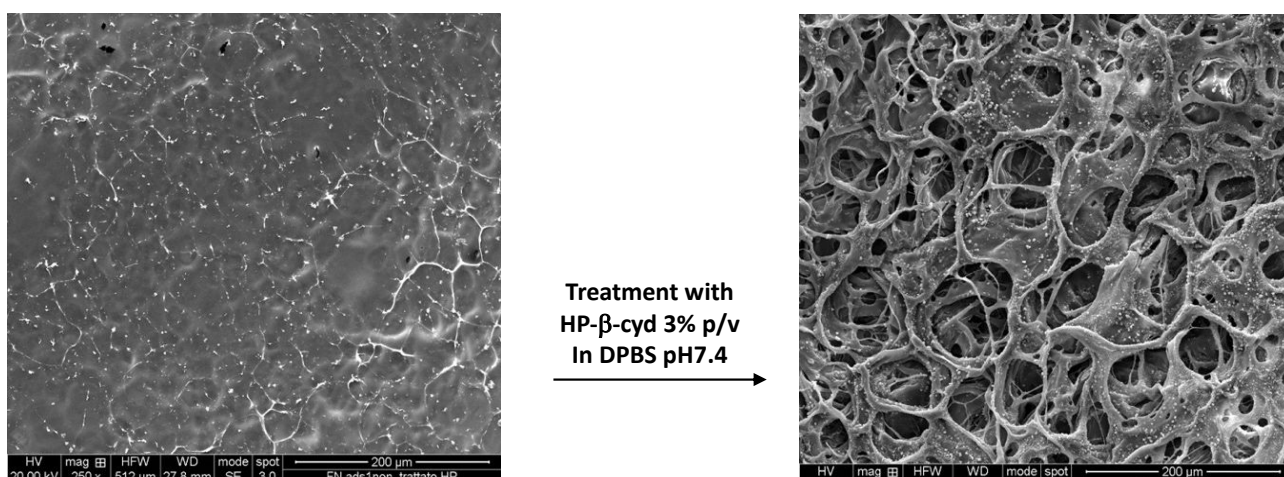

**Figure S2 - SEM images of PLLA/HA-EDA-C<sub>18</sub> scaffold treated with fibronectin before (image on the right) and after (image on the left) 1 hour of incubation with a 3% w/v solution of HP-β-CD in DPBS at pH 7.4**

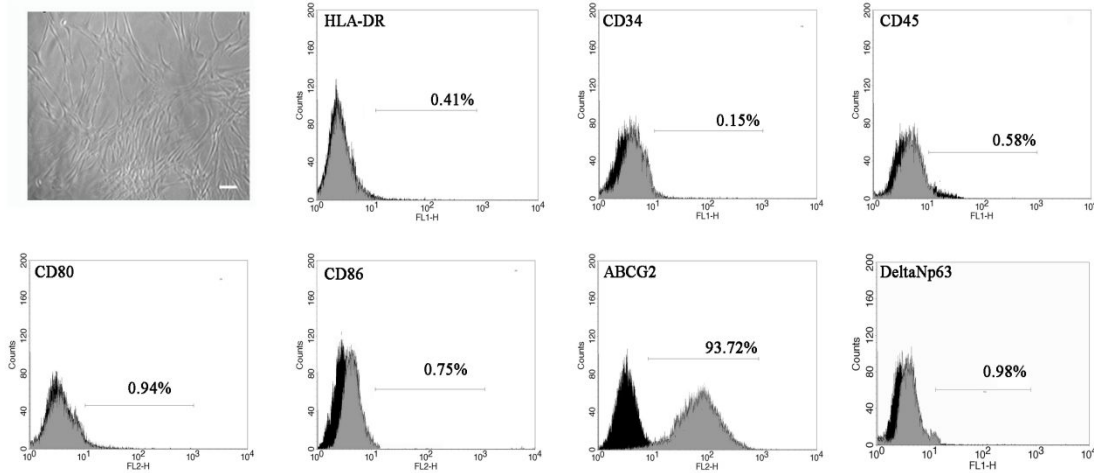

**Figure S3 – f-LSC characterization.** A representative optical microscope image of typical fibroblast-like morphology of f-LSCs (up left); A representative histogram panel of cytometric analysis for hematopoietic markers (HLA-DR, CD34, CD45), T cell activating molecules (CD80, CD86), limbal specific marker (ABCG2) and LESC marker ( $\Delta$ Np63 $\alpha$ ) in f-LSCs. The histogram graphs and quantification analysis were performed by *the CellQuest Pro software*. All pictures are representative of three independent experiments.

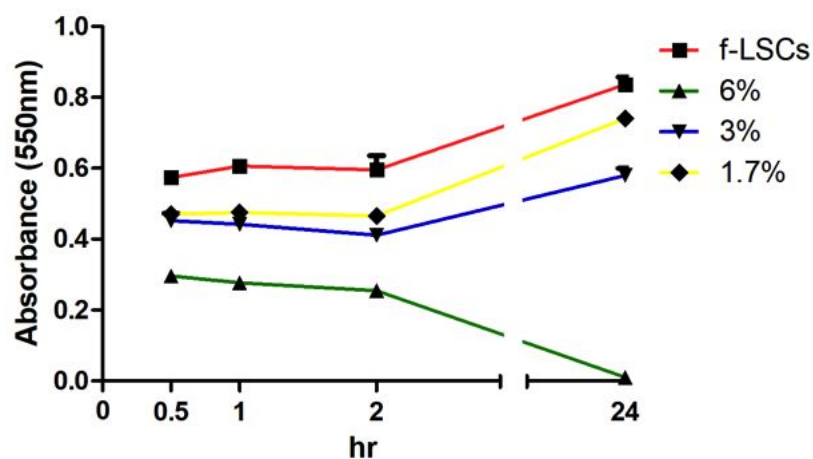

**Figure S4 - Cytotoxic effect of (2-hydroxypropyl)- $\beta$ -cyclodextrin (HP- $\beta$ -CD). Proliferation assay (MTT) of f-LSCs treated with different HP- $\beta$ -CD concentration (1.7%, 3% and 6% w/v in culture medium) compared to no-treated f-LSCs. The line graphs (C-D) were performed by GraphPad Software, Inc., California and are represented as  $\pm$  SD**
